# Supplementary material
Source: Springer Nature journal article supplement (https://www.springermedizin.de/resource/supplementary/13020_2009_67_MOESM5_ESM.pdf/9640994)

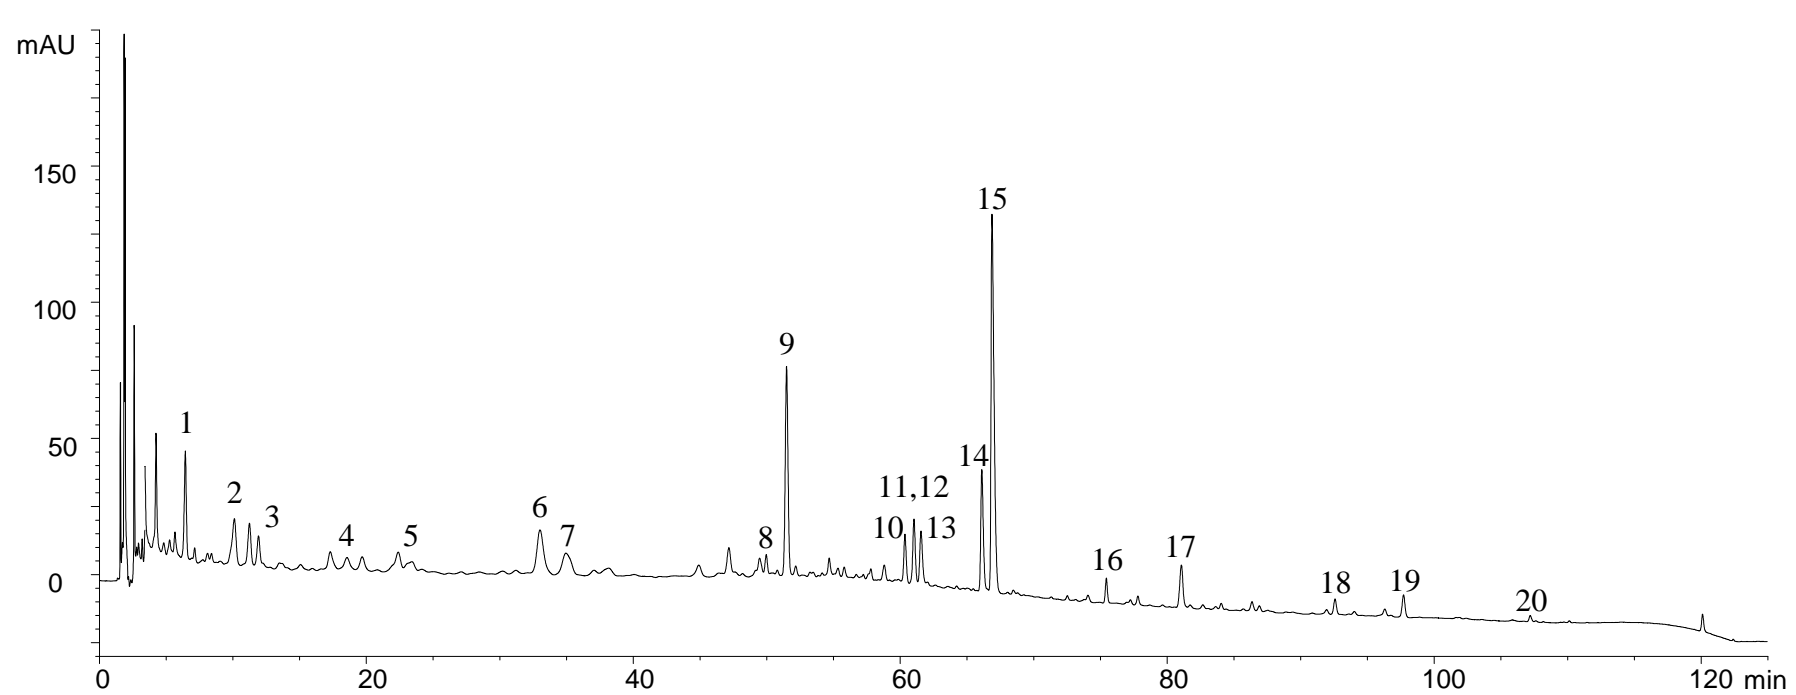

Supplement: MOESM5 [file 9640994]
